# Supplementary material
Source: Royal Society of Chemistry journal article supplement (doi:10.1039/d6ee00784h)
Supplement: d6ee00784h1.pdf [file d6ee00784h1.pdf]

## **An Expandable Cement-Induced Pseudo-Supercapacitor Brick for Self-Energy-Storage Buildings**

Jiarui Xing <sup>a, b</sup>, Lan Wang <sup>c</sup>, Yifan Guo <sup>c</sup>, Weihuan Li <sup>a, b</sup>, Yulin Wang <sup>a, b</sup>, Wenmiao Zhao <sup>a, b</sup>, Yuping Wu <sup>d</sup>, Wei Wang <sup>c, \*</sup>, Jiarui He <sup>d, \*</sup>, Yang Zhou <sup>a, b, \*</sup>

<sup>a</sup> School of Materials Science and Engineering, Southeast University, Nanjing 211189, China

<sup>b</sup> State Key Laboratory of Engineering Materials for Major Infrastructure, Southeast University, Nanjing 211189, China

<sup>c</sup> School of Architecture, Southeast University, Nanjing 211189, China

<sup>d</sup> School of Energy and Environment, Southeast University, Nanjing 211189, China

\* Email: [weiwang@seu.edu.cn](mailto:weiwang@seu.edu.cn) (W.W.), [hejiarui123@sina.com](mailto:hejiarui123@sina.com) (J.H.), [tomaszy@seu.edu.cn](mailto:tomaszy@seu.edu.cn) (Y.Z.).

## Supplementary Figures

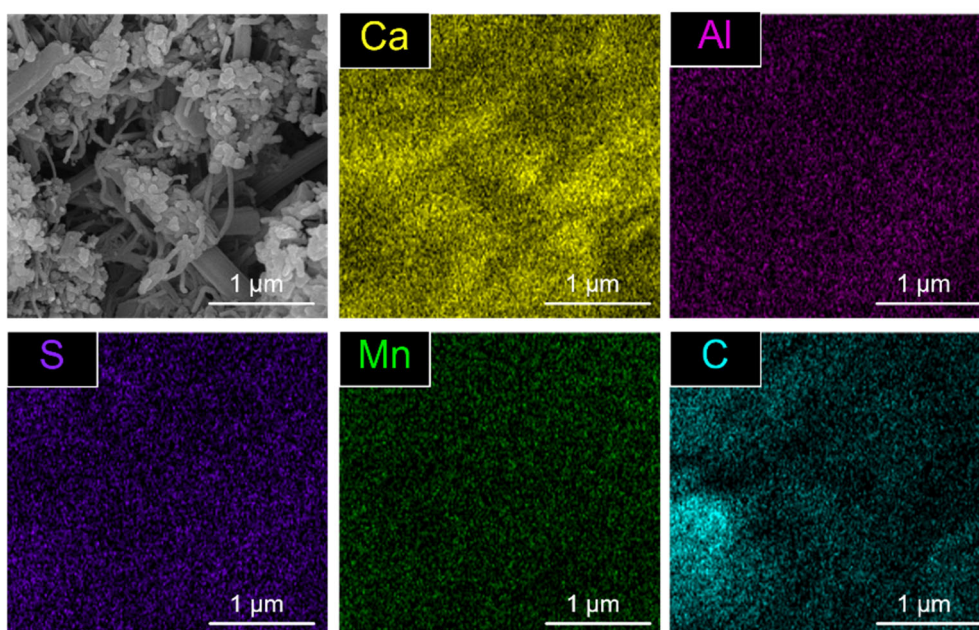

**Fig. S1** SEM images of CPE and corresponding EDS elemental mappings of Ca, Al, S, Mn, and C.

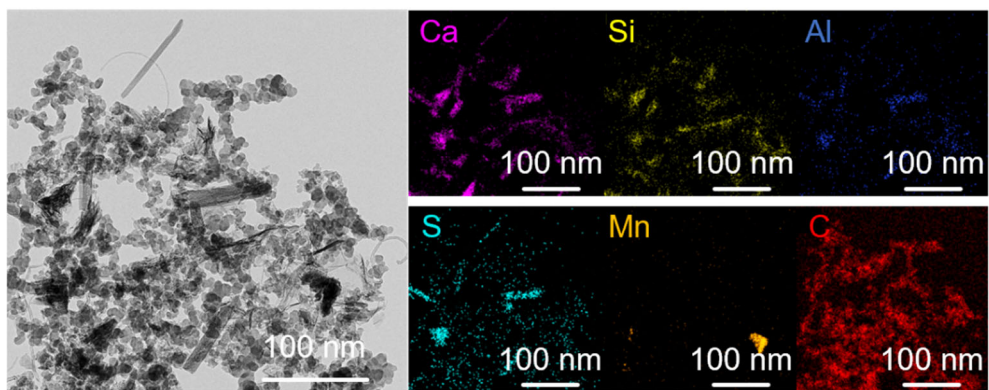

**Fig. S2** TEM image of CPE leaching solution and corresponding EDS elemental mappings of Ca, Si, Al, S, Mn, and O.

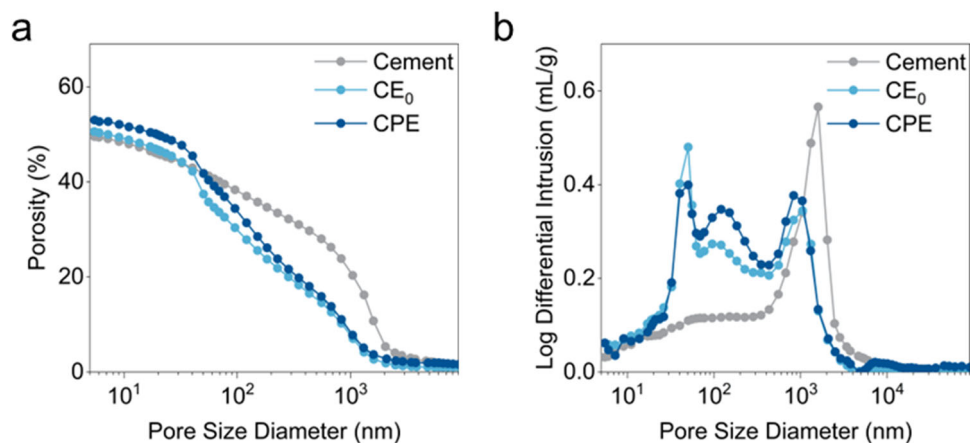

**Fig. S3** MIP results of cement, CE<sub>0</sub>, and CPE. (a) Cumulative porosity. (b) Differential pore size curve.

Mercury intrusion porosimetry (MIP) was measured to quantitatively evaluate the porosity and pore size distribution of the cement matrix, CE<sub>0</sub>, and CPE samples (**Fig. S3**). The results show that the total porosity increases slightly from 49.5% (cement) to 50.6% (CE<sub>0</sub>) and 53.0% (CPE) upon the incorporation of carbon black and carbon nanotubes.

More importantly, the pore size distribution undergoes a significant shift. While the pristine cement matrix is dominated by micron-scale pores (approximately 1  $\mu\text{m}$ ), the CE<sub>0</sub> and CPE samples exhibit a clear reduction in these large pores, accompanied by the emergence of mesopores in the range of 10–100 nm. This pore refinement is beneficial for ion transport and adsorption, thereby contributing to enhanced electrochemical performance. At the same time, the relatively moderate increase in total porosity, together with the reduction of large pores, helps to mitigate adverse effects on mechanical properties.

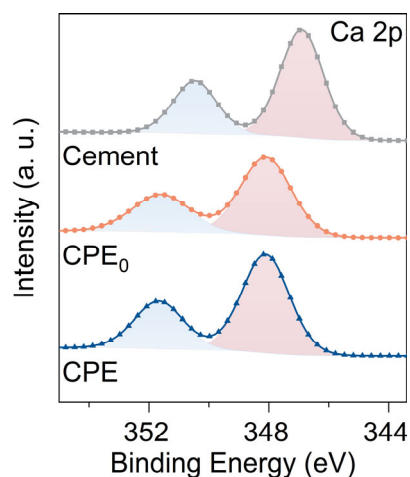

**Fig. S4** Ca 2p spectra of Cement, CPE<sub>0</sub>, and CPE.

In **Fig. S4**, shifts were observed in the Ca 2p spectra, where the Ca 2p<sub>3/2</sub> and Ca 2p<sub>1/2</sub> peaks of pristine PC, initially located at 346.88 eV and 350.48 eV, respectively, shifted toward higher binding energies upon MnO<sub>2</sub> incorporation. This indicates a change in the local electronic environment of calcium ions, suggesting strong ionic interactions between MnO<sub>2</sub> and calcium-rich hydration products such as Ca(OH)<sub>2</sub> and ettringite. These interactions likely contribute to the stabilization of Mn species within the cement matrix and facilitate the in-situ formation of secondary manganese-containing phases.

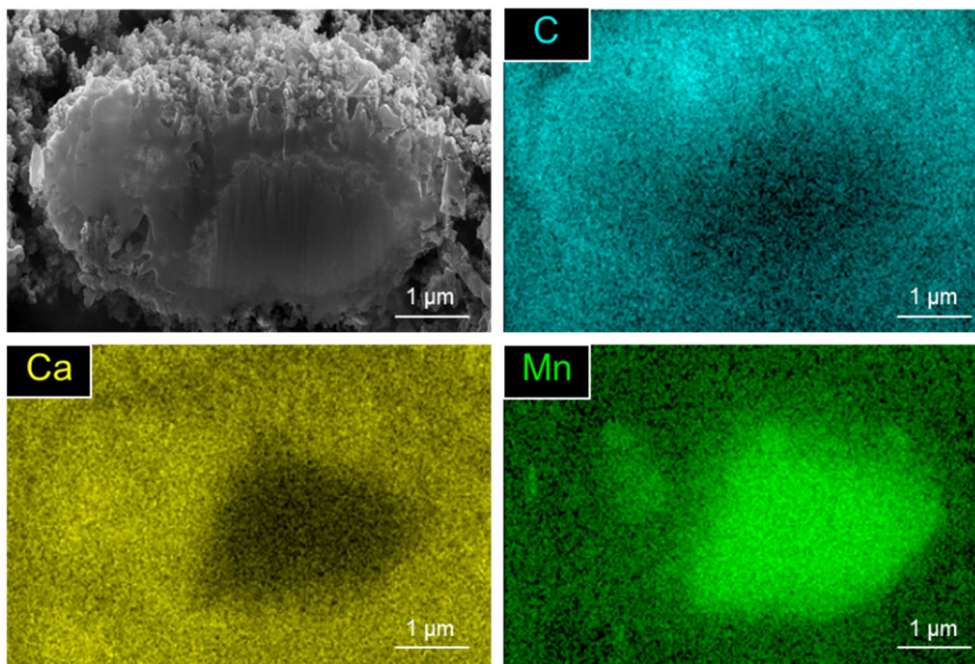

**Fig. S5** FIB-SEM images and elemental mapping of C, Ca, and Mn.

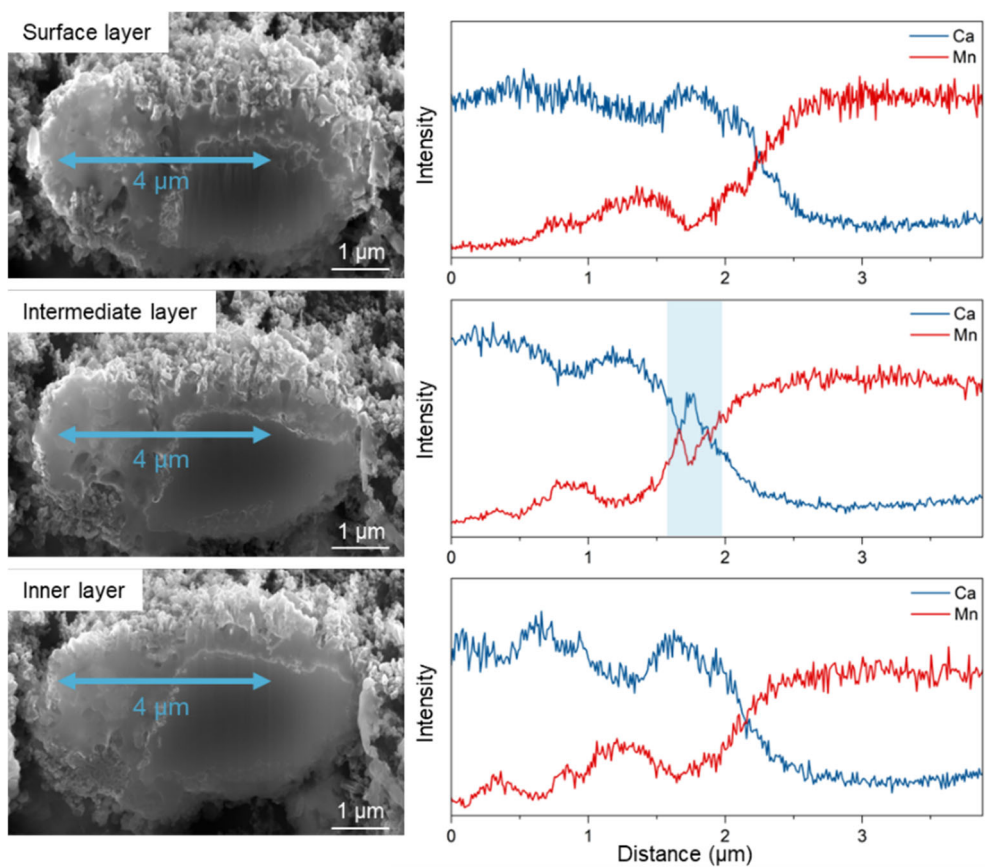

**Fig. S6** Cross-sectional images of the surface layer, intermediate layer, and inner layer, and the variation of Ca and Mn elemental content within a 4 μm defined region.

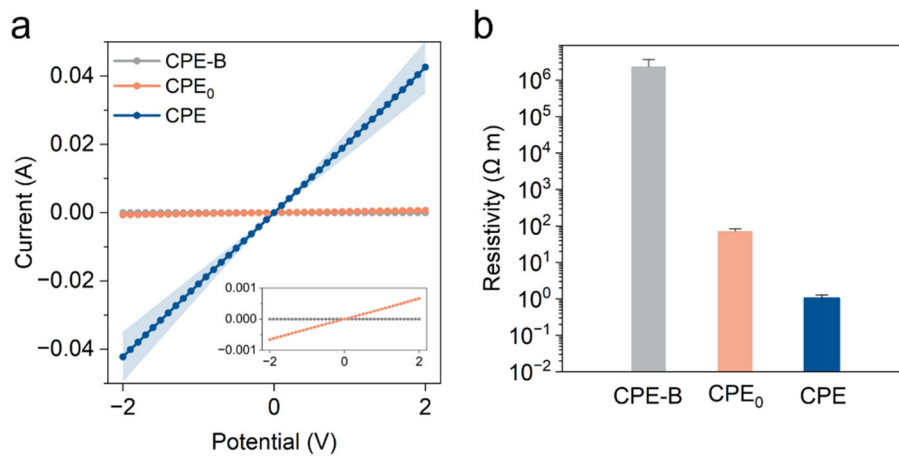

**Fig. S7** (a) I-V curves and (b) the electrical conductivities of CPE-B, CPE<sub>0</sub>, and CPE. Note that CPE-B here is a base group and does not introduce an electronic network to improve the conductivity of cement. CPE-B shows the low conductivity of cement and MnO<sub>2</sub>.

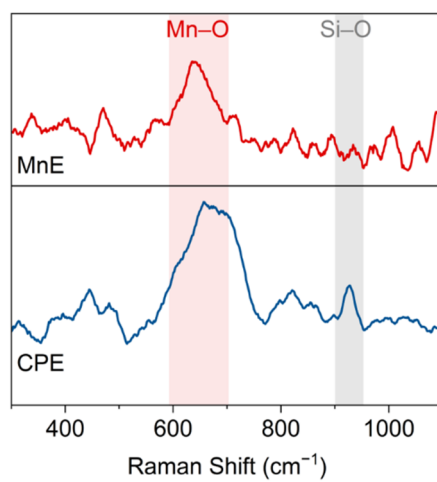

**Fig. S8** Raman spectra of raw MnO<sub>2</sub> and the initial state of CPE obtained from in-situ Raman measurements.

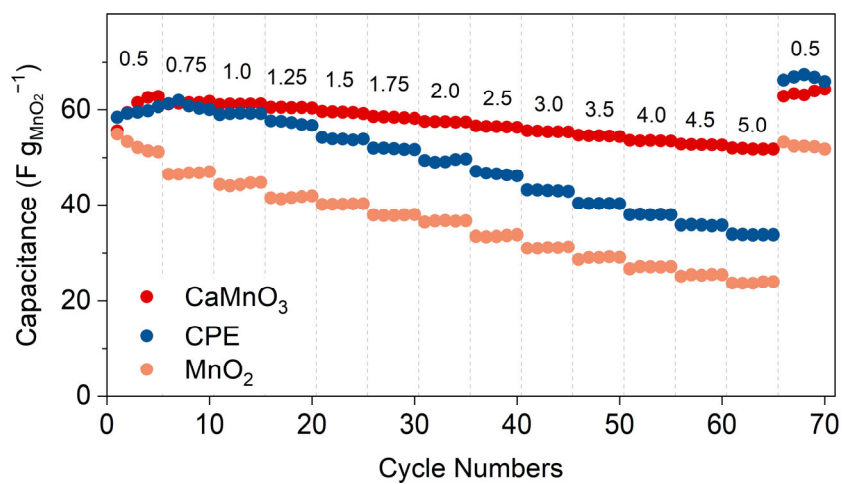

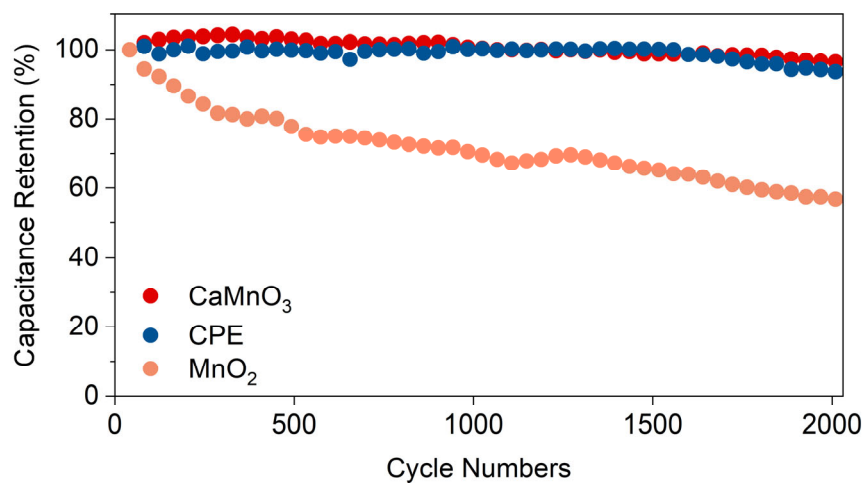

**Fig. S10** Long-cycle capacitance stability of CaMnO<sub>3</sub>, CPE, and MnO<sub>2</sub>.

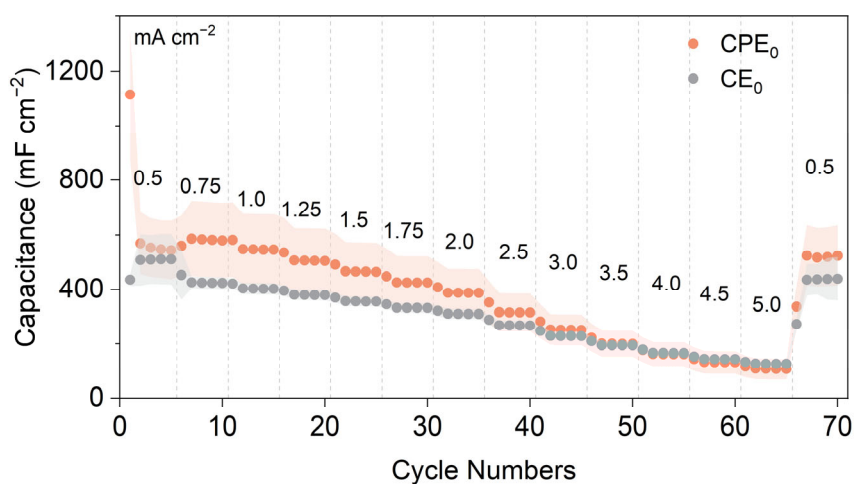

**Fig. S11** Rate performances of CPE<sub>0</sub> and CE<sub>0</sub> at different current densities. Note that the CE<sub>0</sub> group here is composed of cement and carbon black, and there is no pseudocapacitive effect.

To isolate the effect of conductivity, CPE<sub>0</sub> and CE<sub>0</sub> devices were compared (**Figs. S11 and S12**).

At 0.5 mA cm<sup>-2</sup>, they delivered 1114.9 and 436.3 mF cm<sup>-2</sup>, respectively, but both dropped sharply under high current (5.0 mA cm<sup>-2</sup>) due to limited conductive pathways. In contrast, the multiscale conductive network in CPE effectively suppressed internal resistance and ensured sustained utilization of pseudocapacitive sites even under high rates.

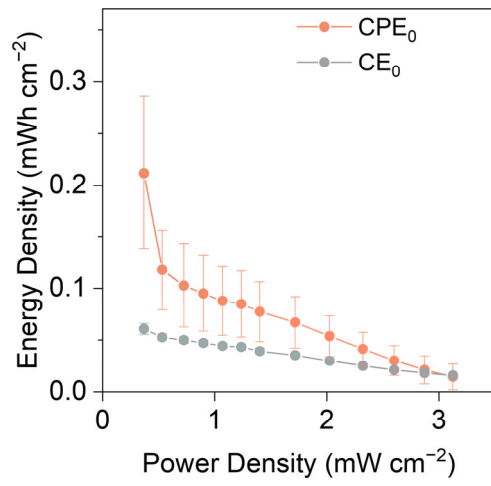

**Fig. S12** Ragone plots of CPE<sub>0</sub> and CE<sub>0</sub>.

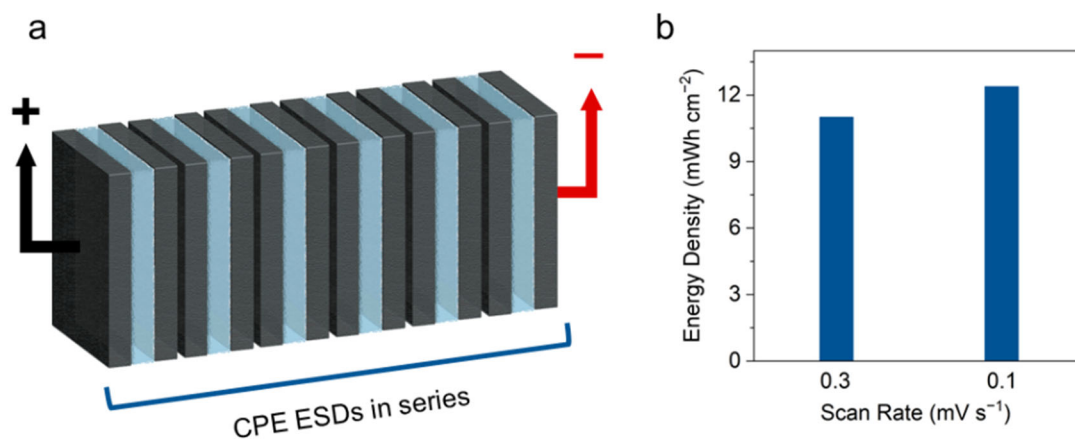

**Fig. S13** (a) Schematic illustration of device series connection. (b) Energy density.

Using a series configuration, CPE-ESDs achieve an energy density of 12.4 mWh cm<sup>-2</sup>, further demonstrating the scalability and practical applicability of the system.

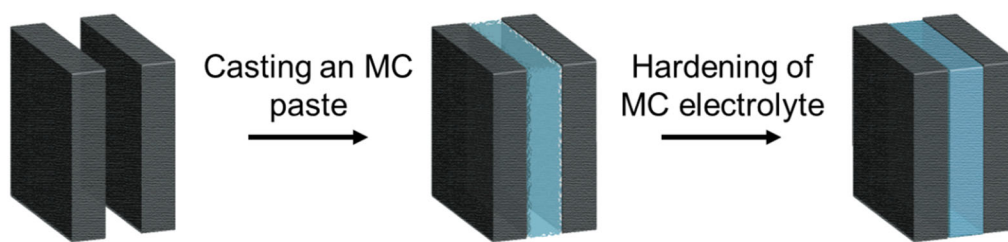

**Fig. S14** Schematic diagrams of the preparation of full-cement ESDs.

As shown in **Fig. S14**, the pre-formed PC electrodes (CPE and PC-anode) were placed on both sides of the mold. The MC electrolyte paste was then cast into the space between the two electrodes. After complete hardening of the MC electrolyte, the PC electrodes were separated and firmly bonded to both sides of the MC electrolyte due to the formation of strong interfacial adhesion.

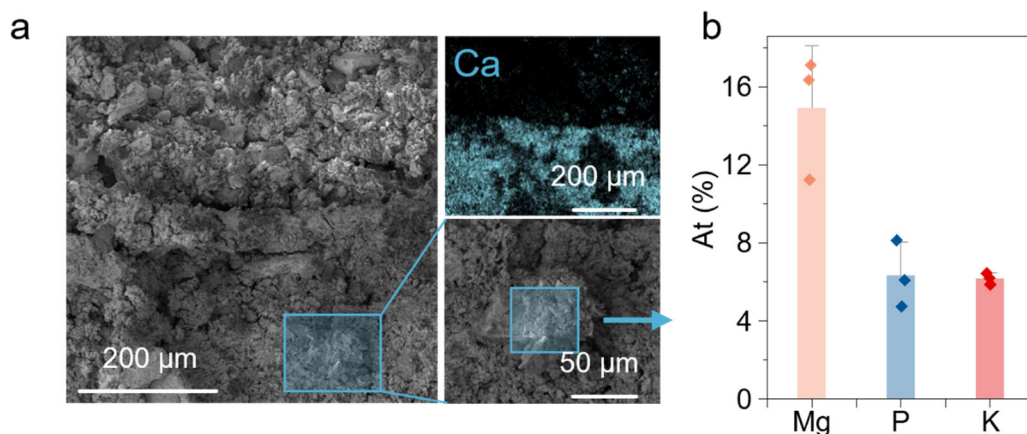

**Fig. S15** (a) Cross-sectional SEM image and Ca elemental mapping of the interface between the CPE (bottom) and MC electrolyte (top). (b) EDS analysis of the interfacial crystal region.

Cross-sectional imaging revealed seamless contact between the MC electrolyte and CPE, with no visible segmentation (**Fig. S15**). Calcium mapping distinguished the electrode region, while a transitional zone with K-struvite morphology emerged at the interface. SEM-EDS confirmed a local Mg:P:K ratio of approximately 2:1:1, suggesting partial infiltration of MC into the porous electrode prior to setting. This in-situ integration forms embedded ionic domains at the interface, enhancing both mechanical cohesion and local electrochemical activity.

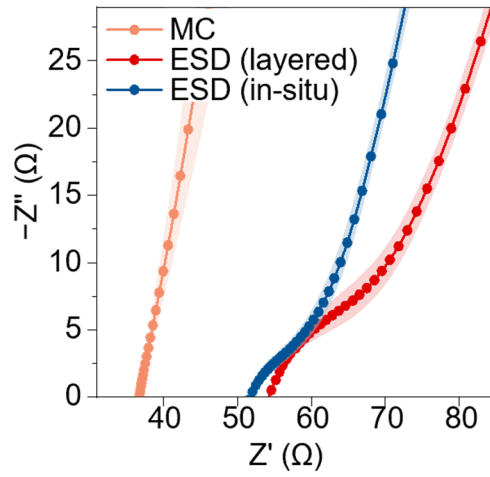

**Fig. S16** EIS curves of the MC electrolyte, and full-cement ESDs fabricated by layered assembly and in-situ solidification. Note that EIS measurements compared three configurations: a standalone MC electrolyte, an in-situ cured full-cement ESD, and a conventional layered ESD.

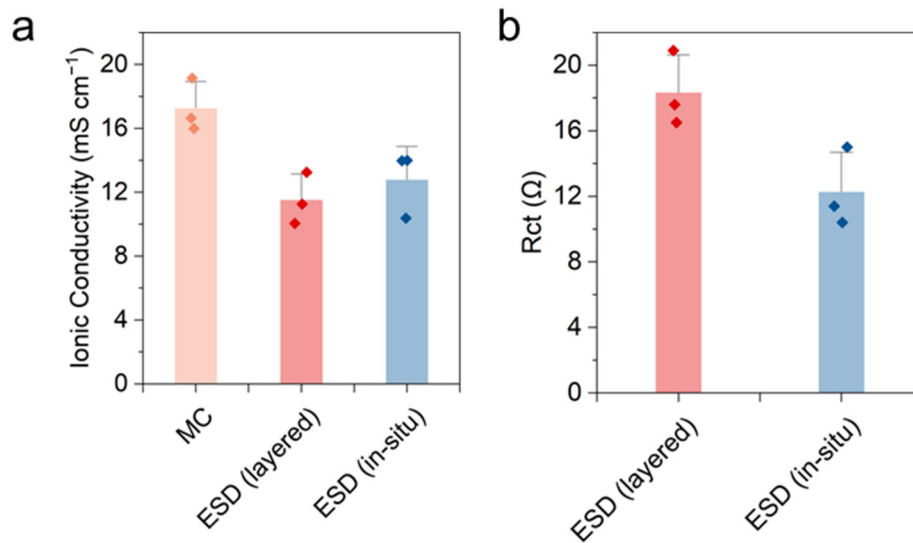

**Fig. S17** (a) Ionic conductivities of pure MC electrolyte, full-cement ESD (layered), and full-cement ESD (in-situ). (b) Interfacial charge-transfer resistances of full-cement ESD (layered) and full-cement ESD (in-situ).

The pure MC showed a bulk resistance of 36.8 Ω, corresponding to 16.6 mS cm<sup>-1</sup> ionic conductivity (**Figs. S16** and **S17**). Upon assembly, the in-situ ESD maintained 14.0 mS cm<sup>-1</sup>, while the layered dropped to 11.3 mS cm<sup>-1</sup>. Notably, the charge transfer resistance (Rct) was also lower in the in-situ design (11.4 Ω) than in the layered assembly (17.6 Ω). These results confirm that in-situ curing improves interfacial ion transport, lowers resistance, and supports the development of cement-based ESDs.

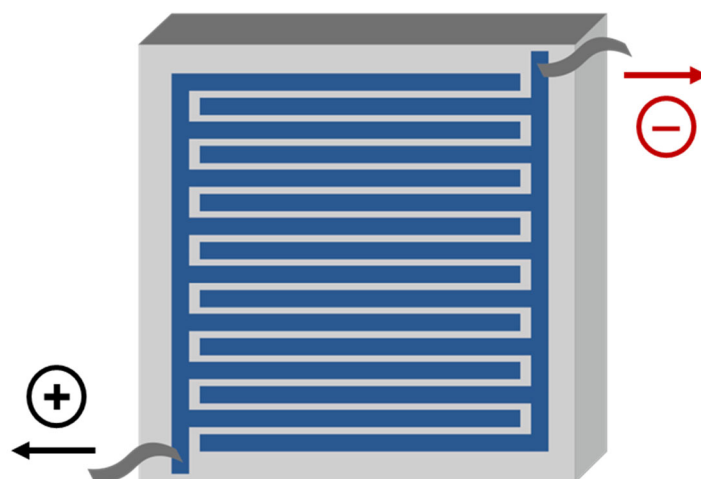

**Fig. S18** Schematic diagrams of full-cement ESDs.

Inspired by micro-flexible device configurations, an interdigitated architecture was adopted to achieve scalable full-cement ESDs (**Fig. S18**). Firstly, two single-sided comb-shaped PC electrodes (CPE and PC-anode) were first prepared using designed silicone molds. Nickel foil was embedded at the electrode terminals to serve as bidirectional current collectors. After curing, the PC electrodes were removed from the molds. The two comb-shaped PC electrodes were then interdigitated and arranged in a mold with dimensions of 20 cm × 20 cm × 2 cm. The pre-defined gap between the electrodes was maintained at approximately 3 mm to facilitate efficient ionic transport. Subsequently, the MC electrolyte paste was evenly cast into the space between the electrodes. Upon complete hardening of the MC electrolyte, the full-cement ESDs were obtained.

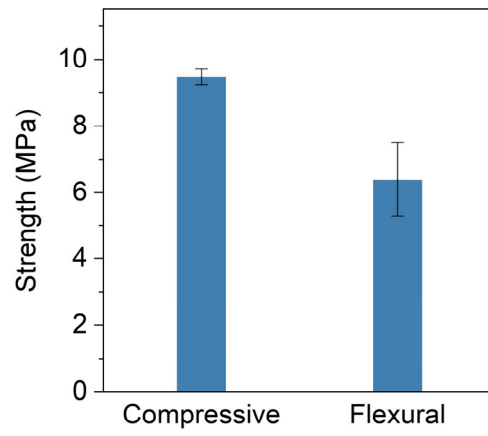

**Fig. S19** Compressive and flexural strength of full-cement ESDs.

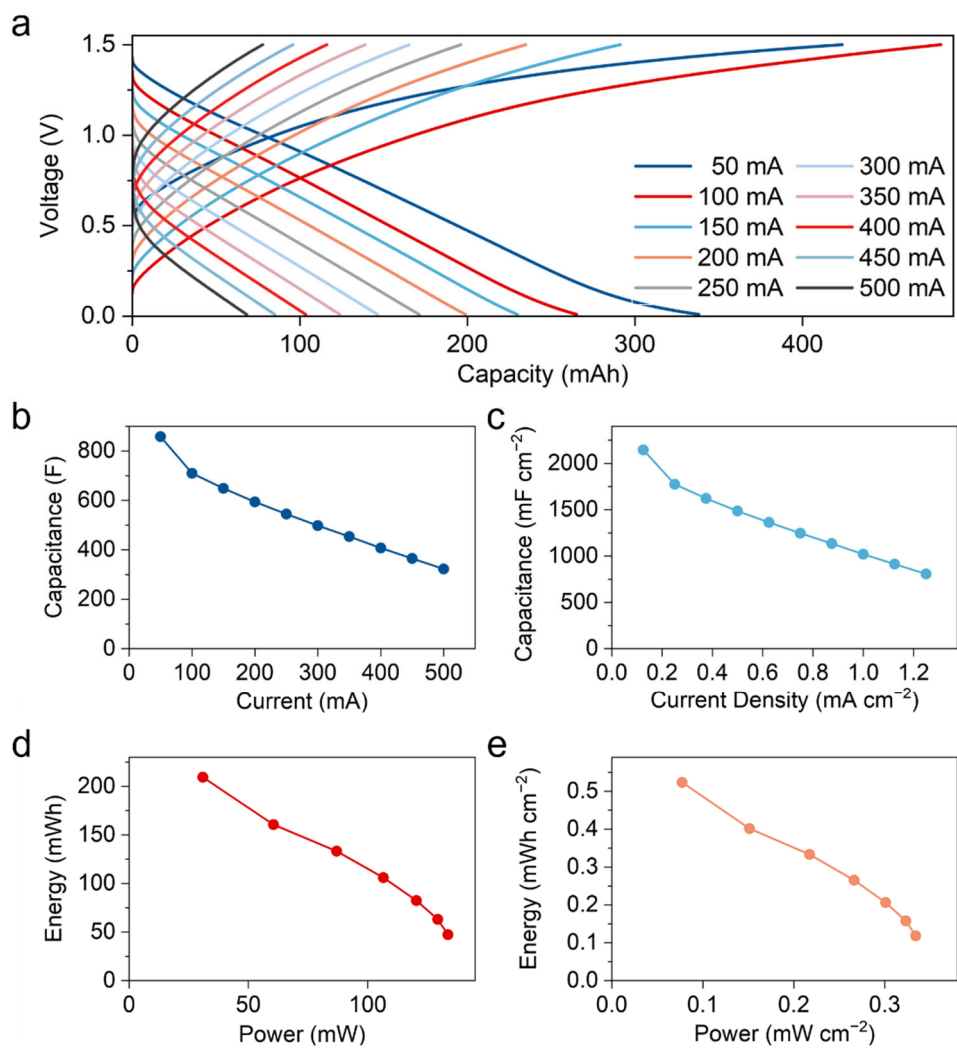

**Fig. S20** Electrochemical performance of full-cement ESDs. (a) Charge-discharge curves; (b) device capacitance; (c) areal capacitance; (d) device energy; (e) areal energy density.

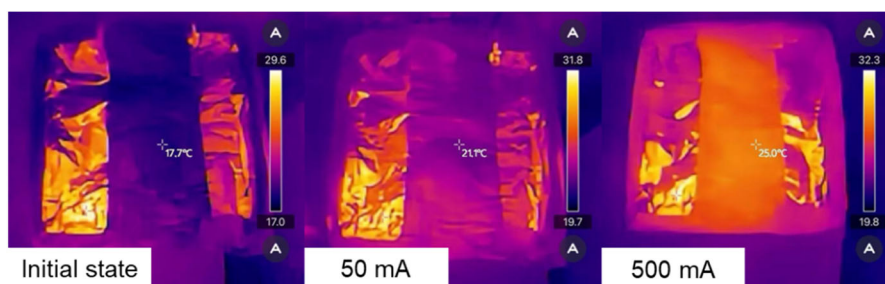

**Fig. S21** Infrared thermography of the full-cement ESDs in the initial state, along with thermal images recorded under currents of 50 mA and 500 mA. All thermal images were captured during the 10th charge/discharge cycle.

Infrared thermal imaging measurements were conducted to monitor the temperature evolution of full-cement ESDs during galvanostatic charge-discharge processes (**Fig. S21**). The surface temperature increased from an initial value of 17.7 °C to 21.1 °C at a current of 50 mA, and further to 25.0 °C at a higher current (10 times increase). The highest local temperature was observed at the current collector (nickel foil), increasing from 29.6 °C to 32.3 °C during operation. These results indicate that the temperature rise of the device remains moderate even under elevated current conditions.

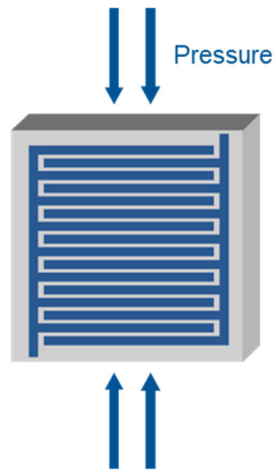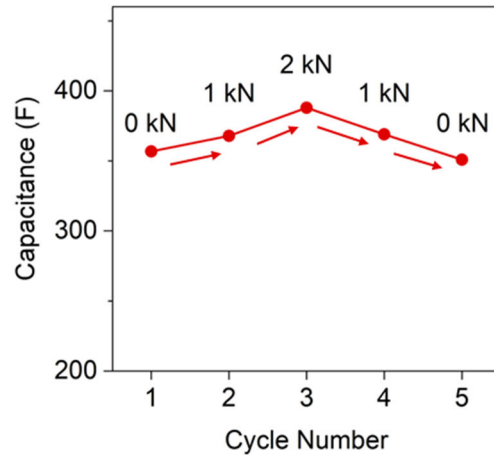

**Fig. S22** Schematic illustration of pressure application and capacitance of full-cement ESDs during the loading and unloading processes.

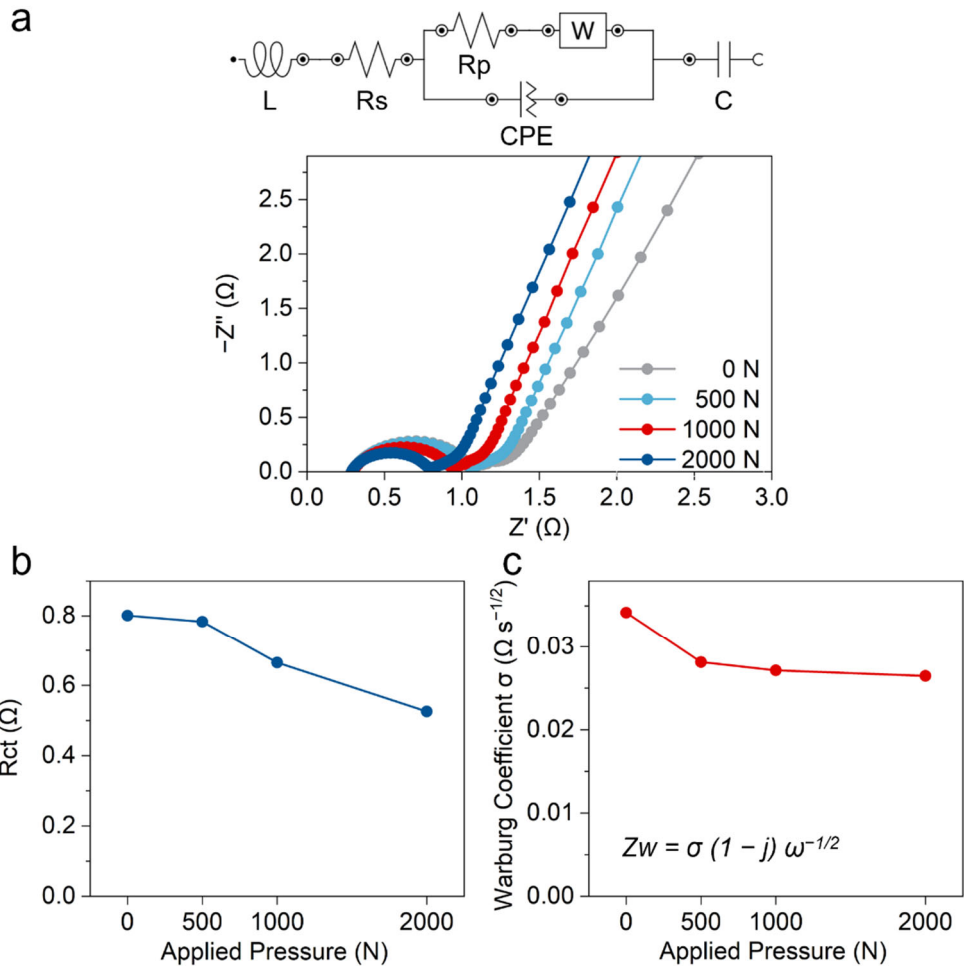

**Fig. S23** EIS results of full-cement ESDs under applied pressure. (a) Nyquist plots and fitted equivalent circuit; (b) charge transfer resistance; (c) Warburg coefficient.

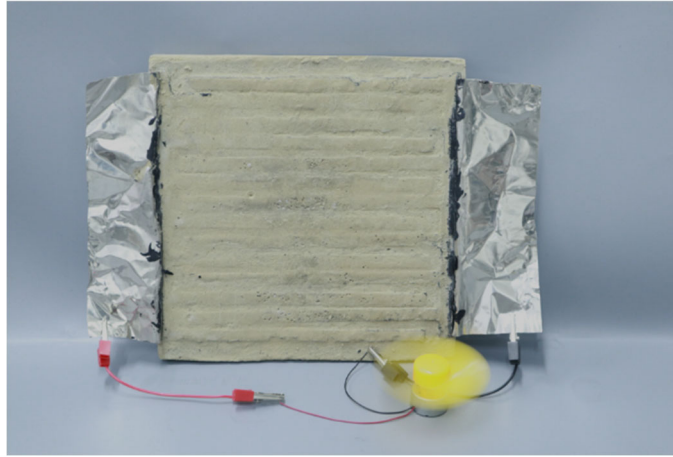

**Fig. S24** A single full-cement ESD powers a small electric fan, which rotates rapidly under electrical drive.

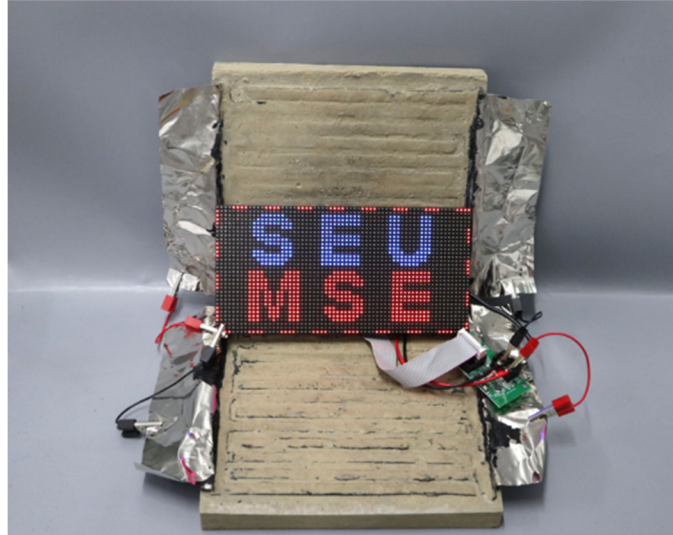

**Fig. S25** Full-cement ESDs power an LED signboard. The signboard has a rated power of 4 W and an area of 20 cm × 10 cm, representing a typical building-scale electrical load.

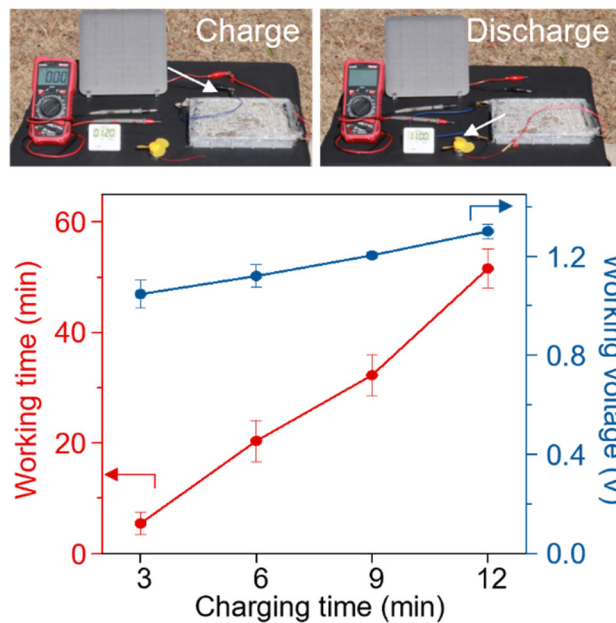

**Fig. S26** Outdoor solar charging and fan-driving test: photographs, output voltage, and fan operation time after different charging durations using a 6 V photovoltaic panel.

In an outdoor PV setup, the ESDs were charged by a 6 V solar panel and used to drive a fan (threshold voltage: 0.6 V). After 3, 6, 9, and 12 minutes of solar charging, output voltages of 1.0, 1.1, 1.2, and 1.3 V were achieved, powering the fan for 5.4, 20.4, 32.2, and 51.5 minutes, respectively. The nonlinear increase in runtime is due to cumulative electrode activation and increased ion mobility at elevated temperatures.

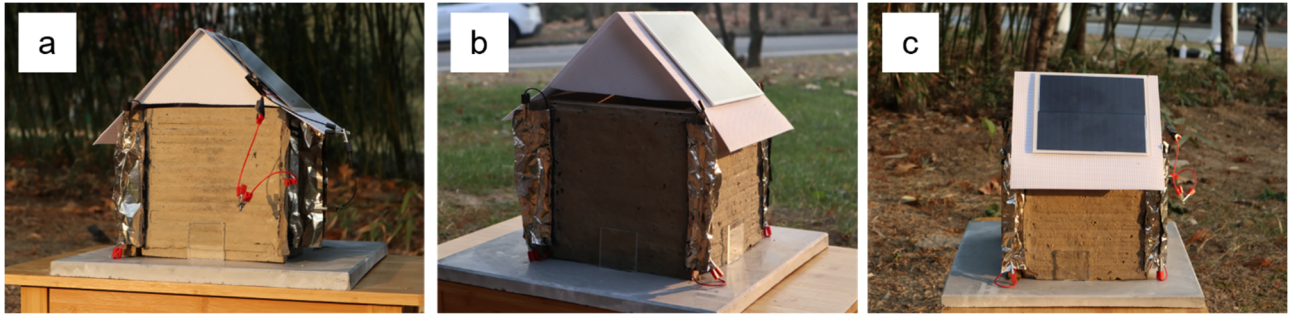

**Fig. S27** Structural configuration of the self-powered building demonstrator. (a) Front view. (b) Rear view. (c) Side view.

The enclosure is constructed from four full-cement energy-storing bricks electrically connected in series through alternating terminals (**Fig. S27**). A rooftop photovoltaic module supplies electrical power under solar irradiation.

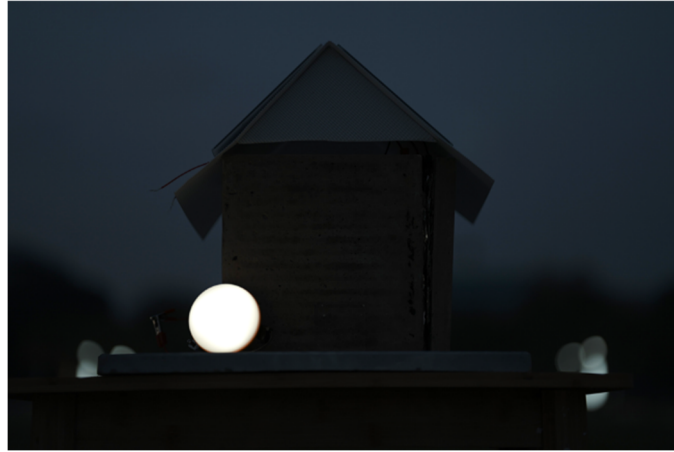

**Fig. S28** The self-powered building demonstrator supplies electrical power to a light bulb during nighttime operation.

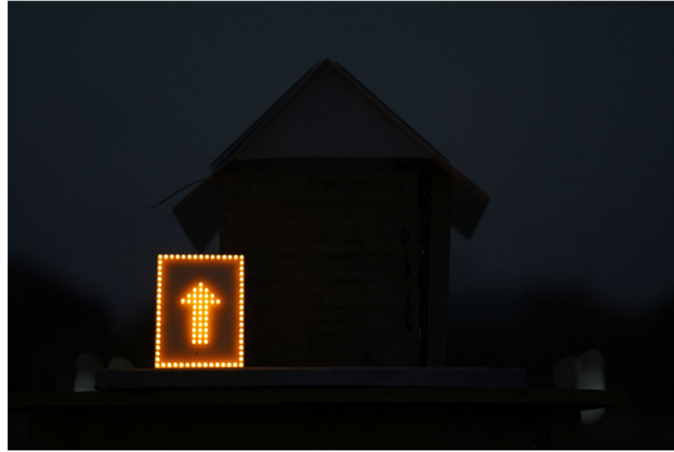

**Fig. S29** The self-powered building model powers an illuminated 15 cm × 10 cm traffic sign during nighttime operation.

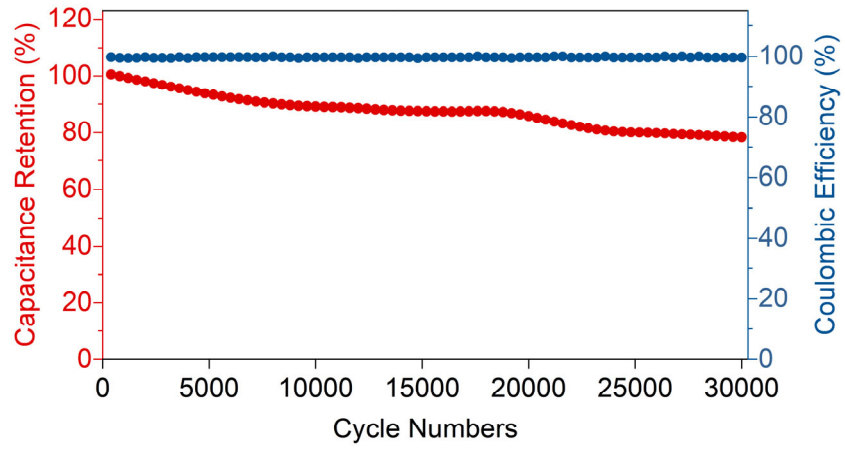

**Fig. S30** Long-cycle capacitance stability of cement-based ESDs with modified oxide.

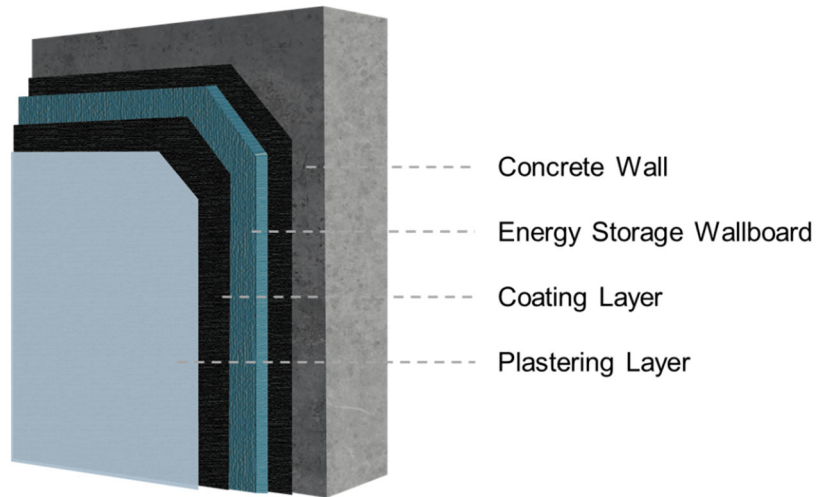

**Fig. S31** Schematic illustration of full-cement ESDs as energy-storing wallboards (semi-structural components), noting that the system also includes a concrete wall for structural load-bearing, as well as a coating layer and a plastering layer.

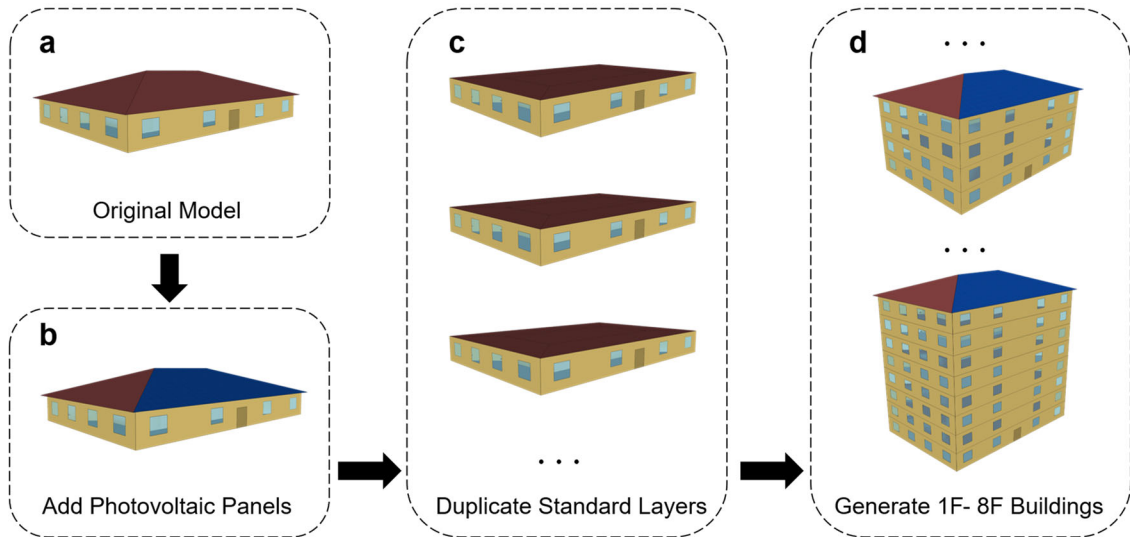

**Fig. S32** Process of generating multi-story building models for simulation. (a) Original building model with modified thermal parameters. (b) Addition of PV panels to the south-facing roof. (c) Duplication of standard structural layers. (d) Generation of building models ranging from 1 to 8 floors for performance evaluation.

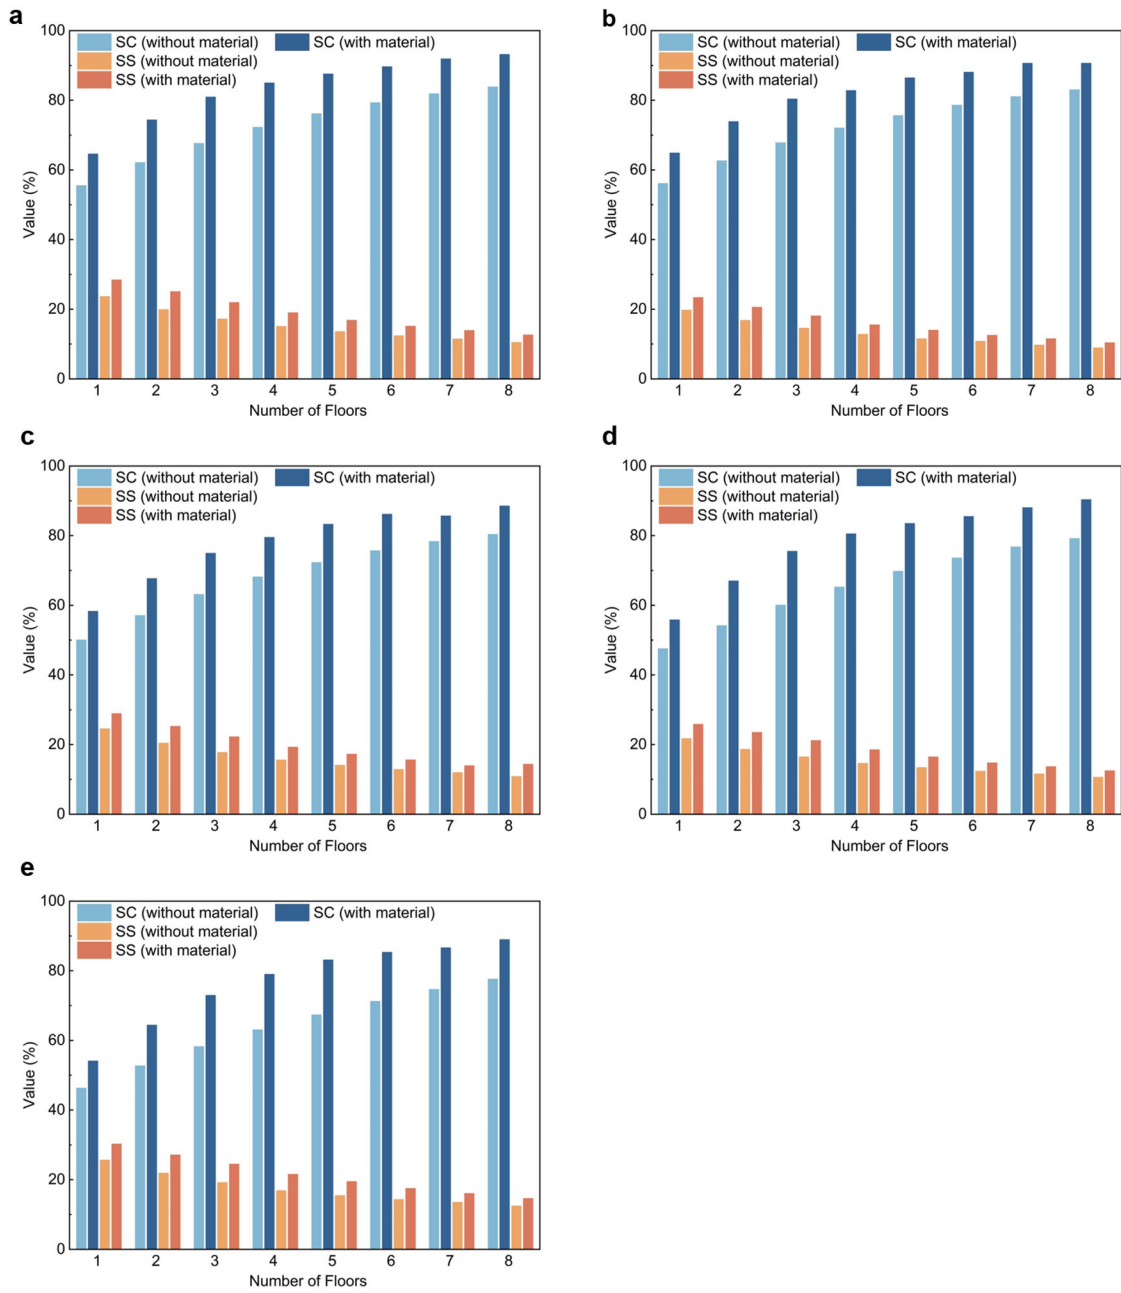

**Fig. S33** SC and SS of residential buildings from 1 floor to 8 floors with or without full-cement ESDs in five cities: (a) Guiyang, (b) Guangzhou, (c) Nanjing, (d) Zhengzhou, (e) Xining.

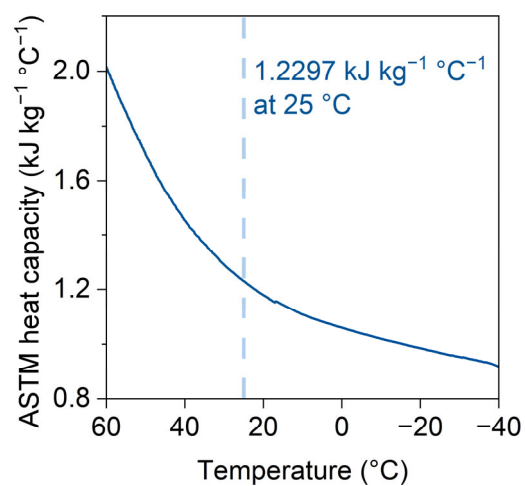

**Fig. S34** Heat capacity of full-cement ESDs at the temperature range from  $-40$  °C to  $60$  °C. Measurements were conducted using the sapphire method on a TA Instruments DSC2500 differential scanning calorimeter.

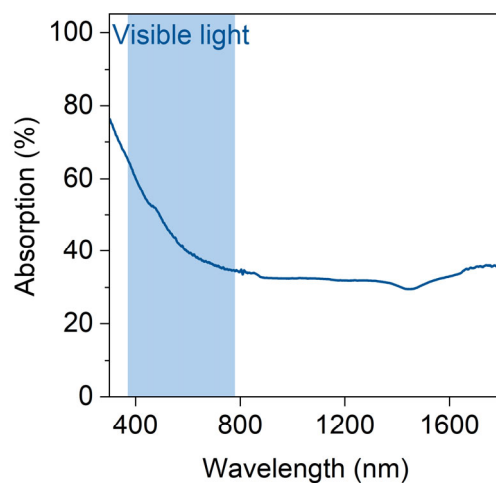

**Fig. S35** Light absorption spectrum of full-cement ESDs under solar radiation. The wavelength range of 370–780 nm corresponds to the visible region. The absorption was measured using a SHIMADZU UV-3600i spectrophotometer.

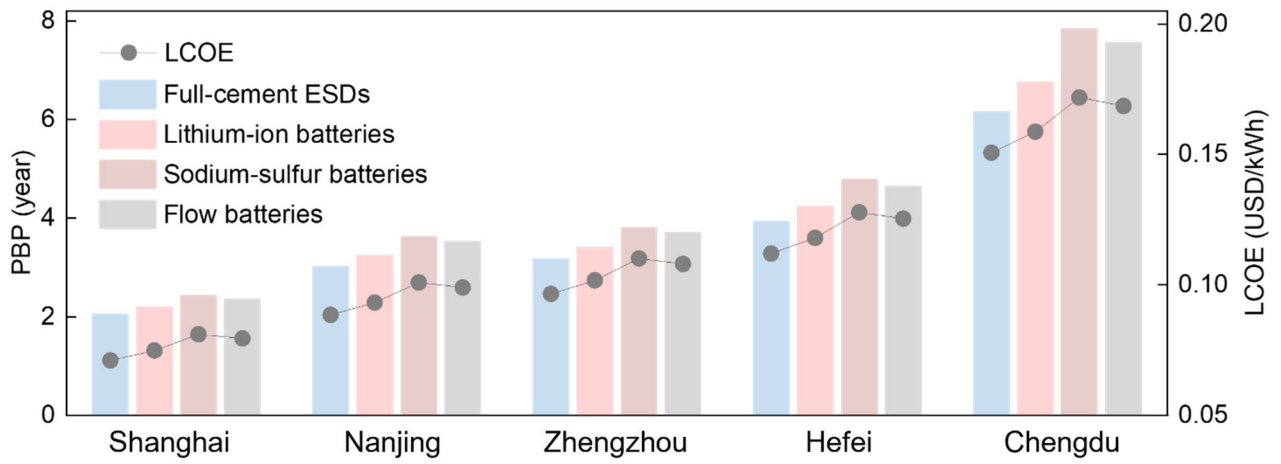

**Fig. S36** The LCOE and PBP of the four types of batteries in Shanghai, Nanjing, Zhengzhou, Hefei and Chengdu.

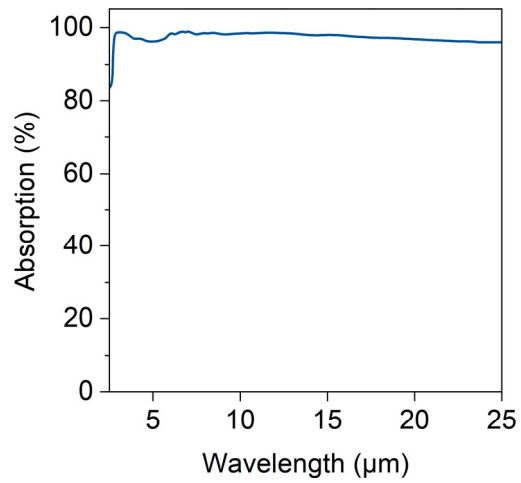

**Fig. S37** Long-wavelength absorption of full-cement ESDs (wavelength > 2.5 μm). Long-wavelength reflection and transmission were measured using a Nicolet iS50 spectrometer.

## Supplementary Tables

**Table S1** Material preparation and mixing ratio of several PC cathodes and anode.

|                  | Portland cement | SiO <sub>2</sub> | Carbon black | MnO <sub>2</sub> | CNT-solution<br>(Solid content 6%) | Carbon fiber | Water |
|------------------|-----------------|------------------|--------------|------------------|------------------------------------|--------------|-------|
| Cement           | 25.0            | \                | \            | \                | \                                  | \            | 37.5  |
| CE <sub>0</sub>  | 21.5            | \                | 3.5          | \                | \                                  | \            | 37.5  |
| CPE-B            | 21.5            | \                | \            | 3.5              | \                                  | \            | 37.5  |
| CPE <sub>0</sub> | 18              | \                | 3.5          | 3.5              | \                                  | \            | 37.5  |
| CPE              | 17.4            | \                | 3.5          | 3.5              | 10.0                               | \            | 28.1  |
| MnE              | 8.7             | 8.7              | 3.5          | 3.5              | 10.0                               | \            | 28.1  |
| PC-anode         | 20.9            | \                | 3.5          | \                | \                                  | 0.6          | 37.5  |

Specifically, the density of the CPE is approximately  $1.40 \text{ g cm}^{-3}$ , the electrode thickness used for electrochemical testing is 3 mm, and the mass loading of MnO<sub>2</sub> is approximately  $43.5 \text{ mg cm}^{-2}$ .

**Table S2** Comparison of electrochemical properties of CPE and the full-cement ESDs with previously reported cement-based energy-storage systems.

|          | Electrode                                                                    | Electrolyte                                        | Areal capacitance<br>(mF cm <sup>-2</sup> ) | Volumetric capacitance<br>(F cm <sup>-3</sup> ) | Gravimetric capacitance<br>(F g <sup>-1</sup> ) | Areal energy density<br>(mWh cm <sup>-2</sup> ) | Sample dimensions                                                         |
|----------|------------------------------------------------------------------------------|----------------------------------------------------|---------------------------------------------|-------------------------------------------------|-------------------------------------------------|-------------------------------------------------|---------------------------------------------------------------------------|
| Ref [18] | Carbon-cement with CB                                                        | 1M KCl                                             | 939.5                                       | 1.57                                            | 21.67                                           | \                                               | 3.8 cm <sup>2</sup> × 0.6 cm                                              |
| Ref [24] | Carbon-cement with PAM hydrogel                                              | 1M KCl                                             | 1708                                        | 2.135                                           | 19.5                                            | 0.316                                           | 4.9 cm <sup>2</sup> × 0.8 cm                                              |
| Ref [45] | rGO-coated CNT-cement                                                        | 1M KCl                                             | 902                                         | 2.841                                           | 37.16                                           | \                                               | 1 cm <sup>2</sup> × 0.5 cm                                                |
| Ref [19] | Ni <sub>2</sub> (CO <sub>3</sub> )(OH) <sub>2</sub> /Co(OH) <sub>2</sub> @NF | PAA-KOH-aluminate cement                           | 415.31                                      | 2.08                                            | \                                               | \                                               | 1 cm <sup>2</sup> × 0.2 cm                                                |
| Ref [23] | rGO/CuO@CF                                                                   | PAA-cement with 5wt% LiOTf                         | 314.9                                       | 0.31                                            | \                                               | 0.56                                            | 1 cm <sup>2</sup> × 1 cm                                                  |
| Ref [26] | 3D rGO@MnO <sub>2</sub> NF                                                   | PAA-cement with 1.8M KOH                           | 51.5                                        | 0.05                                            | 25.2                                            | \                                               | 1 cm <sup>2</sup> × 1 cm                                                  |
| Ref [27] | PPy-NTs cathode and acid-treated CNTs anode                                  | PAM-cement with 3% Na <sub>2</sub> SO <sub>4</sub> | 1180                                        | 1.18                                            | 59                                              | 0.105                                           | 1 cm <sup>2</sup> × 1 cm (testing)<br>16 cm <sup>2</sup> × 16 cm (series) |
| Ref [42] | rGO@NF                                                                       | PAM-cement with 14.28% KOH                         | 95.33                                       | 0.48                                            | \                                               | 0.013                                           | 20.25 cm <sup>2</sup> × 0.2 cm                                            |

|                                      |           |                                                                    |         |      |                                        |                                      |                               |
|--------------------------------------|-----------|--------------------------------------------------------------------|---------|------|----------------------------------------|--------------------------------------|-------------------------------|
| Ref [43]                             | 3D rGO@NF | PAA-cement<br>with 2M<br>KOH                                       | 172.56  | 0.17 | \                                      | \                                    | 1 cm <sup>2</sup> × 1<br>cm   |
| Ref [44]                             | rGO@NF    | PAM-cement<br>with 4M<br>KOH and<br>0.3M NaBr                      | 357.02  | 0.36 | \                                      | 0.446                                | 1 cm <sup>2</sup> × 1<br>cm   |
| Ref [46]                             | rGO@NF    | PAM-cement<br>with 4M<br>KOH                                       | 51.63   | 0.05 | 59.72                                  | 0.004                                | 1 cm <sup>2</sup> × 1<br>cm   |
| This<br>work<br>(material-<br>scale) | CPE       | 1M<br>CH <sub>3</sub> COONH <sub>4</sub>                           | 2930.6  | 4.88 | 67.4<br>(43.5 mg<br>cm <sup>-2</sup> ) | 0.88<br>12.4<br>(series,<br>Fig.S13) | 1 cm <sup>2</sup> ×<br>0.3 cm |
| This<br>work<br>(brick-<br>scale)    | CPE       | MC<br>electrolyte<br>with 1M<br>CH <sub>3</sub> COONH <sub>4</sub> | 2145.25 | 1.07 | 38.8                                   | 0.52                                 | 400 cm <sup>2</sup> ×<br>2 cm |

**Table S3** Detailed parameters of the PV panel used for building prototype charging.

---

|                                                                         |              |
|-------------------------------------------------------------------------|--------------|
| Dimensions                                                              | 153 × 180 mm |
| Rated voltage                                                           | 5 V          |
| Rated current                                                           | 1200 mA      |
| Peak power                                                              | 6 W          |
| Open-circuit voltage under the illumination conditions on the test day  | 6.31 V       |
| Short-circuit current under the illumination conditions on the test day | 0.21 A       |

---

**Table S4** Thermal properties of full-cement ESDs. All thermophysical parameters used in the simulation were experimentally measured from the designed full-cement ESDs.

---

|                        |                                                                                           |
|------------------------|-------------------------------------------------------------------------------------------|
| Thickness              | 20 mm                                                                                     |
| Density                | 1460 kg m <sup>-3</sup>                                                                   |
| Thermal conductivity   | 0.23 W m <sup>-1</sup> K <sup>-1</sup>                                                    |
| Specific heat capacity | 1.2297 kJ kg <sup>-1</sup> K <sup>-1</sup><br>(at 25 °C, see details in <b>Fig. S34</b> ) |

---

The thermal conductivity was determined using the HotDisk method. Benefit from the porous structure, full-cement ESDs exhibit a low thermal conductivity of 0.23 W m<sup>-1</sup> K<sup>-1</sup>, suggesting excellent thermal insulation when serving as energy-storing wallboards.



|          |          |     |      |     |     |   |
|----------|----------|-----|------|-----|-----|---|
| and Warm |          |     |      |     |     |   |
| Winter   |          |     |      |     |     |   |
| Zone B   |          |     |      |     |     |   |
| Moderate |          |     |      |     |     |   |
| Climate  | Guiyang, | 0.4 | 0.35 | 0.5 | 0.8 | 1 |
| Zone A   | Kunming  |     |      |     |     |   |
| Moderate |          |     |      |     |     | \ |
| Climate  |          | \   |      |     | 1   | 2 |
| Zone B   |          |     |      |     |     |   |

---

Thirty-one cities in China are selected as the research objects. Since the cities are located in different regions and climate varies greatly, in order to make the energy consumption simulation more accurate and meet the requirements of energy-saving design for buildings, some main parameters were modified refer to the standards promulgated by China when setting up the models. Parameters in **Table S5** are derived from publicly available data (<https://www.ladybug.tools/epwmap/>).

**Table S6** Climate region, cities, and heat transfer coefficient.

| Climate Region                  | Cities                                                                                    | Exterior Wall Heat Transfer Coefficient [W/(m <sup>2</sup> ·K)] | Roof Heat Transfer Coefficient [W/(m <sup>2</sup> ·K)] |
|---------------------------------|-------------------------------------------------------------------------------------------|-----------------------------------------------------------------|--------------------------------------------------------|
| Severe Cold Zone                | Harbin, Changchun, Shenyang, Hohhot, Xining, Urumqi                                       | 0.300                                                           | 0.200                                                  |
| Cold Zone                       | Taiyuan, Lanzhou, Yinchuan, Lhasa, Beijing, Tianjin, Jinan, Shijiazhuang, Zhengzhou, Xian | 0.35                                                            | 0.302                                                  |
| Hot Summer and Cold Winter Zone | Shanghai, Hefei, Nanjing, Hangzhou, Wuhan, Changsha, Nanchang, Chengdu, Chongqing         | 0.967                                                           | 0.708                                                  |
| Hot Summer and Warm Winter Zone | Fuzhou, Guangzhou, Nanning, Haikou                                                        | 0.652                                                           | 0.398                                                  |
| Moderate Climate Zone           | Guiyang, Kunming                                                                          | 0.967                                                           | 0.708                                                  |

Data sources for **Tables S5** and **S6**:

- [1]. MOHURD (2018). JGJ 26-2018: Design standard for energy efficiency of residential buildings in severe cold and cold zones. Ministry of Housing and Urban–Rural Development of China. Beijing: China Architecture & Building Press. (in Chinese)
- [2]. MOHURD (2010). JGJ 134-2010: Design standard for energy efficiency of residential buildings in hot summer and cold winter zone. Ministry of Housing and Urban–Rural Development of China. Beijing: China Architecture & Building Press. (in Chinese)
- [3]. MOHURD (2012). JGJ 75-2012: Design standard for energy efficiency of residential buildings in hot summer and warm winter zone. Ministry of Housing and Urban–Rural Development of China. Beijing: China Architecture & Building Press. (in Chinese)
- [4]. MOHURD (2019). JGJ 475-2019: Standard for design of energy efficiency of residential buildings in moderate climate zone. Ministry of Housing and Urban–Rural Development of China. Beijing: China Architecture & Building Press. (in Chinese)

**Table S7** ERP and FIT of 30 Chinese cities used in the economic analysis.

| City      |     | Price (CNY/kWh) | Source                                                | Source website                                                                                                                                                              |
|-----------|-----|-----------------|-------------------------------------------------------|-----------------------------------------------------------------------------------------------------------------------------------------------------------------------------|
| Hefei     | ERP | 0.5653          | State Grid                                            | <a href="https://95598.cn/omg-static//omg-static/99301191537179325338801585459039.pdf">https://95598.cn/omg-static//omg-static/99301191537179325338801585459039.pdf</a>     |
|           | FIT | 0.3837          | China Energy Storage Network                          | <a href="https://t.10jqka.com.cn/pid_552097198.shtml">https://t.10jqka.com.cn/pid_552097198.shtml</a>                                                                       |
| Beijing   | ERP | 0.5103          | State Grid                                            | <a href="https://95598.cn/omg-static//omg-static/99304280949180277548600603128424.pdf">https://95598.cn/omg-static//omg-static/99304280949180277548600603128424.pdf</a>     |
|           | FIT | 0.3598          | Beijing Municipal Development and Reform Commission   | <a href="https://fgw.beijing.gov.cn/fgwzwwgk/2024zcyj/202511/t20251107_4265707.htm">https://fgw.beijing.gov.cn/fgwzwwgk/2024zcyj/202511/t20251107_4265707.htm</a>           |
| Chongqing | ERP | 0.5400          | State Grid                                            | <a href="https://95598.cn/osgweb/ipSupportDetailItems">https://95598.cn/osgweb/ipSupportDetailItems</a>                                                                     |
|           | FIT | 0.3964          | Chongqing Municipal Development and Reform Commission | <a href="https://fzggw.cq.gov.cn/zwwgk/zfxxgkml/zcyj/202510/t20251017_15089590_wap.html">https://fzggw.cq.gov.cn/zwwgk/zfxxgkml/zcyj/202510/t20251017_15089590_wap.html</a> |
| Fuzhou    | ERP | 0.5330          | State Grid                                            | <a href="https://95598.cn/osgweb/ipSupportDetailItems">https://95598.cn/osgweb/ipSupportDetailItems</a>                                                                     |
|           | FIT | 0.3932          | Fujian Provincial Development and Reform Commission   | <a href="https://guangfu.bjx.com.cn/news/20251029/1467177-1.shtml">https://guangfu.bjx.com.cn/news/20251029/1467177-1.shtml</a>                                             |
| Lanzhou   | ERP | 0.5250          | State Grid                                            | <a href="https://95598.cn/osgweb/ipSupportDetailItems">https://95598.cn/osgweb/ipSupportDetailItems</a>                                                                     |
|           | FIT | 0.1954          | China Energy Storage Network                          | <a href="https://t.10jqka.com.cn/pid_552097198.shtml">https://t.10jqka.com.cn/pid_552097198.shtml</a>                                                                       |
| Guangzhou | ERP | 0.6259          | China Southern Power Grid                             | <a href="https://95598.csg.cn/#/gd/serviceInquire/LRLayer/elePriceInquire">https://95598.csg.cn/#/gd/serviceInquire/LRLayer/elePriceInquire</a>                             |
|           | FIT | 0.3600          | China Energy Storage Network                          | <a href="https://t.10jqka.com.cn/pid_552097198.shtml">https://t.10jqka.com.cn/pid_552097198.shtml</a>                                                                       |
| Nanning   | ERP | 0.5491          | China Southern Power Grid                             | <a href="https://95598.csg.cn/#/gd/serviceInquire/LRLayer/elePriceInquire">https://95598.csg.cn/#/gd/serviceInquire/LRLayer/elePriceInquire</a>                             |
|           | FIT | 0.4207          | Guangxi Provincial Development and Reform Commission  | <a href="http://www.redianshebei.cn/zhengce/show.php?itemid=1630">http://www.redianshebei.cn/zhengce/show.php?itemid=1630</a>                                               |
| Guiyang   | ERP | 0.4820          | China Southern Power Grid                             | <a href="https://95598.csg.cn/#/gd/serviceInquire/LRLayer/elePriceInquire">https://95598.csg.cn/#/gd/serviceInquire/LRLayer/elePriceInquire</a>                             |
|           | FIT | 0.3515          | Guizhou Provincial Development and Reform Commission  | <a href="https://power.in-en.com/html/power-2463276.shtml">https://power.in-en.com/html/power-2463276.shtml</a>                                                             |
| Haikou    | ERP | 0.6295          | China Southern Power Grid                             | <a href="https://95598.csg.cn/#/gd/serviceInquire/LRLayer/elePriceInquire">https://95598.csg.cn/#/gd/serviceInquire/LRLayer/elePriceInquire</a>                             |

|              |     |        |                                                                                              |                                                                                                                                                                                                 |
|--------------|-----|--------|----------------------------------------------------------------------------------------------|-------------------------------------------------------------------------------------------------------------------------------------------------------------------------------------------------|
|              | FIT | 0.4298 | Hainan Provincial<br>Development and Reform<br>Commission                                    | <a href="https://guangfu.bjx.com.cn/news/20250928/1463209.shtml">https://guangfu.bjx.com.cn/news/20250928/1463209.shtml</a>                                                                     |
| Shijiazhuang | ERP | 0.5362 | State Grid                                                                                   | <a href="https://95598.cn/osgweb/ipSupportDetailItems">https://95598.cn/osgweb/ipSupportDetailItems</a>                                                                                         |
|              | FIT | 0.3344 | Hebei Provincial<br>Development and Reform<br>Commission                                     | <a href="https://hbdrc.hebei.gov.cn/gggs_980/202512/t20251212_129418.html">https://hbdrc.hebei.gov.cn/gggs_980/202512/t20251212_129418.html</a>                                                 |
| Harbin       | ERP | 0.5100 | State Grid                                                                                   | <a href="https://95598.cn/osgweb/ipSupportDetailItems">https://95598.cn/osgweb/ipSupportDetailItems</a>                                                                                         |
|              | FIT | 0.2281 | China Energy Storage<br>Network                                                              | <a href="https://t.10jqka.com.cn/pid_552097198.shtml">https://t.10jqka.com.cn/pid_552097198.shtml</a>                                                                                           |
| Zhengzhou    | ERP | 0.5680 | State Grid                                                                                   | <a href="https://95598.cn/osgweb/ipSupportDetailItems">https://95598.cn/osgweb/ipSupportDetailItems</a>                                                                                         |
|              | FIT | 0.3779 | Henan Provincial<br>Development and Reform<br>Commission                                     | <a href="https://fgw.henan.gov.cn/2025/12-11/3272958.html">https://fgw.henan.gov.cn/2025/12-11/3272958.html</a>                                                                                 |
| Wuhan        | ERP | 0.5800 | State Grid                                                                                   | <a href="https://95598.cn/osgweb/ipSupportDetailItems">https://95598.cn/osgweb/ipSupportDetailItems</a>                                                                                         |
|              | FIT | 0.4161 | Hubei Provincial<br>Development and Reform<br>Commission                                     | <a href="https://news.bjx.com.cn/html/20251218/1475320.shtml">https://news.bjx.com.cn/html/20251218/1475320.shtml</a>                                                                           |
| Changsha     | ERP | 0.6040 | State Grid                                                                                   | <a href="https://95598.cn/osgweb/ipSupportDetailItems">https://95598.cn/osgweb/ipSupportDetailItems</a>                                                                                         |
|              | FIT | 0.3750 | Hunan Provincial<br>Development and Reform<br>Commission                                     | <a href="https://fgw.hunan.gov.cn/fgw/xxgk_70899/tzgg/202512/t20251225_33879144.html">https://fgw.hunan.gov.cn/fgw/xxgk_70899/tzgg/202512/t20251225_33879144.html</a>                           |
| Nanjing      | ERP | 0.5483 | State Grid                                                                                   | <a href="https://95598.cn/osgweb/ipSupportDetailItems">https://95598.cn/osgweb/ipSupportDetailItems</a>                                                                                         |
|              | FIT | 0.3600 | State Grid New Energy<br>Cloud (SGNE Cloud)                                                  | <a href="https://news.bjx.com.cn/html/20251211/1474264.shtml">https://news.bjx.com.cn/html/20251211/1474264.shtml</a>                                                                           |
| Nanchang     | ERP | 0.6200 | State Grid                                                                                   | <a href="https://95598.cn/osgweb/ipSupportDetailItems">https://95598.cn/osgweb/ipSupportDetailItems</a>                                                                                         |
|              | FIT | 0.3300 | China Energy Storage<br>Network                                                              | <a href="https://t.10jqka.com.cn/pid_552097198.shtml">https://t.10jqka.com.cn/pid_552097198.shtml</a>                                                                                           |
| Changchun    | ERP | 0.5424 | State Grid                                                                                   | <a href="https://95598.cn/osgweb/ipSupportDetailItems">https://95598.cn/osgweb/ipSupportDetailItems</a>                                                                                         |
|              | FIT | 0.3731 | Jilin Provincial<br>Development and Reform<br>Commission & Jilin<br>Provincial Energy Bureau | <a href="https://xxgk.jl.gov.cn/zcbm/fgw/xxgkmlqy/202510/t20251015_9336159.html">https://xxgk.jl.gov.cn/zcbm/fgw/xxgkmlqy/202510/t20251015_9336159.html</a>                                     |
| Shenyang     | ERP | 0.500  | State Grid                                                                                   | <a href="https://95598.cn/osgweb/ipSupportDetailItems">https://95598.cn/osgweb/ipSupportDetailItems</a>                                                                                         |
|              | FIT | 0.3749 | Liaoning Provincial<br>Development and Reform<br>Commission                                  | <a href="https://www.ln.gov.cn/web/zwgkx/lnsrmzfgb/2025n/qk/2025n_dessq/bmwj/2025112009280272814/">https://www.ln.gov.cn/web/zwgkx/lnsrmzfgb/2025n/qk/2025n_dessq/bmwj/2025112009280272814/</a> |
| Hohhot       | ERP | 0.477  | State Grid                                                                                   | <a href="https://95598.cn/osgweb/ipSupportDetailItems">https://95598.cn/osgweb/ipSupportDetailItems</a>                                                                                         |
|              | FIT | 0.2829 | Inner Mongolia<br>Autonomous Region Energy<br>Bureau                                         | <a href="https://nyj.nmg.gov.cn/tzgg/202601/t202601092847060.html">https://nyj.nmg.gov.cn/tzgg/202601/t202601092847060.html</a>                                                                 |
|              | ERP | 0.4986 | State Grid                                                                                   | <a href="https://95598.cn/osgweb/ipSupportDetailItems">https://95598.cn/osgweb/ipSupportDetailItems</a>                                                                                         |

|          |     |        |                                                                 |                                                                                                                                                                                               |
|----------|-----|--------|-----------------------------------------------------------------|-----------------------------------------------------------------------------------------------------------------------------------------------------------------------------------------------|
| Yinchuan | FIT | 0.2595 | Ningxia Hui Autonomous Region Development and Reform Commission | <a href="https://fzggw.nx.gov.cn/tzgg/202510/t20251031_5070782.html">https://fzggw.nx.gov.cn/tzgg/202510/t20251031_5070782.html</a>                                                           |
| Xinining | ERP | 0.3964 | State Grid                                                      | <a href="https://95598.cn/osgweb/ipSupportDetailItems">https://95598.cn/osgweb/ipSupportDetailItems</a>                                                                                       |
|          | FIT | 0.2400 | China Energy Storage Network                                    | <a href="https://t.10jqka.com.cn/pid_552097198.shtml">https://t.10jqka.com.cn/pid_552097198.shtml</a>                                                                                         |
| Xi'an    | ERP | 0.4900 | State Grid                                                      | <a href="https://95598.cn/osgweb/ipSupportDetailItems">https://95598.cn/osgweb/ipSupportDetailItems</a>                                                                                       |
|          | FIT | 0.3500 | Shaanxi Provincial Development and Reform Commission            | <a href="https://sndrc.shaanxi.gov.cn/zfxxgk/zc/fgwj/sfzggwwj/2025/202510/t20251031_3580689.html">https://sndrc.shaanxi.gov.cn/zfxxgk/zc/fgwj/sfzggwwj/2025/202510/t20251031_3580689.html</a> |
| Jinan    | ERP | 0.5550 | State Grid                                                      | <a href="https://95598.cn/osgweb/ipSupportDetailItems">https://95598.cn/osgweb/ipSupportDetailItems</a>                                                                                       |
|          | FIT | 0.2250 | China Energy Storage Network                                    | <a href="https://t.10jqka.com.cn/pid_552097198.shtml">https://t.10jqka.com.cn/pid_552097198.shtml</a>                                                                                         |
| Shanghai | ERP | 0.6170 | State Grid                                                      | <a href="https://95598.cn/osgweb/ipSupportDetailItems">https://95598.cn/osgweb/ipSupportDetailItems</a>                                                                                       |
|          | FIT | 0.4155 | China Energy Storage Network                                    | <a href="https://t.10jqka.com.cn/pid_552097198.shtml">https://t.10jqka.com.cn/pid_552097198.shtml</a>                                                                                         |
| Taiyuan  | ERP | 0.4870 | State Grid                                                      | <a href="https://95598.cn/osgweb/ipSupportDetailItems">https://95598.cn/osgweb/ipSupportDetailItems</a>                                                                                       |
|          | FIT | 0.3320 | Shanxi Provincial Development and Reform Commission             | <a href="https://finance.sina.cn/2025-11-13/detail-inxfthe4018602.d.html">https://finance.sina.cn/2025-11-13/detail-inxfthe4018602.d.html</a>                                                 |
| Chengdu  | ERP | 0.5464 | State Grid                                                      | <a href="https://95598.cn/osgweb/ipSupportDetailItems">https://95598.cn/osgweb/ipSupportDetailItems</a>                                                                                       |
|          | FIT | 0.3730 | Sichuan Provincial Development and Reform Commission            | <a href="https://fgw.sc.gov.cn/sfgw/tzgg/2025/12/31/df590a59b26346989e74cf884bbc0d62.shtml">https://fgw.sc.gov.cn/sfgw/tzgg/2025/12/31/df590a59b26346989e74cf884bbc0d62.shtml</a>             |
| Tianjin  | ERP | 0.5100 | State Grid                                                      | <a href="https://95598.cn/osgweb/ipSupportDetailItems">https://95598.cn/osgweb/ipSupportDetailItems</a>                                                                                       |
|          | FIT | 0.3196 | China Energy Storage Network                                    | <a href="https://t.10jqka.com.cn/pid_552097198.shtml">https://t.10jqka.com.cn/pid_552097198.shtml</a>                                                                                         |
| Urumqi   | ERP | 0.4750 | State Grid                                                      | <a href="https://95598.cn/osgweb/ipSupportDetailItems">https://95598.cn/osgweb/ipSupportDetailItems</a>                                                                                       |
|          | FIT | 0.2350 | China Energy Storage Network                                    | <a href="https://t.10jqka.com.cn/pid_552097198.shtml">https://t.10jqka.com.cn/pid_552097198.shtml</a>                                                                                         |
| Kunming  | ERP | 0.4840 | China Southern Power Grid                                       | <a href="http://www.yn.csg.cn/">http://www.yn.csg.cn/</a>                                                                                                                                     |
|          | FIT | 0.3300 | China Energy Storage Network                                    | <a href="https://t.10jqka.com.cn/pid_552097198.shtml">https://t.10jqka.com.cn/pid_552097198.shtml</a>                                                                                         |
| Hangzhou | ERP | 0.5580 | State Grid                                                      | <a href="https://95598.cn/osgweb/ipSupportDetailItems">https://95598.cn/osgweb/ipSupportDetailItems</a>                                                                                       |
|          | FIT | 0.4153 | Zhejiang Provincial Development and Reform Commission           | <a href="https://solar.in-en.com/html/solar-2455574.shtml">https://solar.in-en.com/html/solar-2455574.shtml</a>                                                                               |

(The exchange rate calculation is USD/CNY=0.1453.)

**Table S8** PBP and LCOE of the four types of batteries in 30 Chinese cities.

| City         | Full-cement ESDs |                | Lithium-ion batteries |                | Sodium-sulfur batteries |                | Flow batteries |                |
|--------------|------------------|----------------|-----------------------|----------------|-------------------------|----------------|----------------|----------------|
|              | PBP (year)       | LCOE (USD/kWh) | PBP (year)            | LCOE (USD/kWh) | PBP (year)              | LCOE (USD/kWh) | PBP (year)     | LCOE (USD/kWh) |
| Hefei        | 3.93             | 0.112          | 4.24                  | 0.118          | 4.79                    | 0.128          | 4.65           | 0.125          |
| Beijing      | 3.16             | 0.087          | 3.39                  | 0.092          | 3.79                    | 0.100          | 3.69           | 0.098          |
| Chongqing    | 7.13             | 0.163          | 7.88                  | 0.172          | 9.27                    | 0.186          | 8.90           | 0.183          |
| Fuzhou       | 2.60             | 0.076          | 2.78                  | 0.080          | 3.09                    | 0.087          | 3.01           | 0.085          |
| Lanzhou      | 3.87             | 0.091          | 4.17                  | 0.096          | 4.71                    | 0.104          | 4.57           | 0.102          |
| Guangzhou    | 3.81             | 0.119          | 4.10                  | 0.125          | 4.63                    | 0.136          | 4.50           | 0.133          |
| Nanning      | 3.97             | 0.115          | 4.29                  | 0.121          | 4.84                    | 0.131          | 4.70           | 0.128          |
| Guiyang      | 4.07             | 0.105          | 4.40                  | 0.110          | 4.97                    | 0.119          | 4.82           | 0.117          |
| Haikou       | 3.40             | 0.112          | 3.66                  | 0.118          | 4.10                    | 0.128          | 3.98           | 0.126          |
| Shijiazhuang | 3.61             | 0.101          | 3.88                  | 0.107          | 4.37                    | 0.115          | 4.24           | 0.113          |
| Harbin       | 3.56             | 0.086          | 3.82                  | 0.091          | 4.30                    | 0.098          | 4.18           | 0.096          |
| Zhengzhou    | 3.17             | 0.097          | 3.41                  | 0.102          | 3.81                    | 0.110          | 3.71           | 0.108          |
| Wuhan        | 3.71             | 0.112          | 3.99                  | 0.118          | 4.50                    | 0.128          | 4.37           | 0.125          |
| Changsha     | 4.39             | 0.127          | 4.75                  | 0.134          | 5.39                    | 0.145          | 5.22           | 0.142          |
| Nanjing      | 3.01             | 0.089          | 3.24                  | 0.093          | 3.62                    | 0.101          | 3.52           | 0.099          |
| Nanchang     | 3.94             | 0.114          | 4.26                  | 0.121          | 4.81                    | 0.131          | 4.67           | 0.128          |
| Changchun    | 2.59             | 0.079          | 2.76                  | 0.084          | 3.07                    | 0.090          | 2.99           | 0.089          |
| Shenyang     | 2.75             | 0.078          | 2.94                  | 0.082          | 3.28                    | 0.089          | 3.19           | 0.087          |
| Hohhot       | 3.58             | 0.086          | 3.85                  | 0.091          | 4.33                    | 0.098          | 4.20           | 0.097          |
| Yinchuan     | 3.62             | 0.087          | 3.90                  | 0.091          | 4.39                    | 0.099          | 4.26           | 0.097          |
| Xining       | 4.24             | 0.079          | 4.59                  | 0.083          | 5.19                    | 0.090          | 5.03           | 0.088          |
| Xian         | 4.63             | 0.110          | 5.01                  | 0.116          | 5.71                    | 0.126          | 5.54           | 0.123          |
| Jinan        | 4.04             | 0.102          | 4.37                  | 0.107          | 4.93                    | 0.116          | 4.79           | 0.114          |
| Shanghai     | 2.05             | 0.071          | 2.19                  | 0.075          | 2.42                    | 0.081          | 2.36           | 0.080          |
| Taiyuan      | 3.43             | 0.090          | 3.69                  | 0.095          | 4.14                    | 0.103          | 4.02           | 0.101          |
| Chengdu      | 6.15             | 0.151          | 6.75                  | 0.159          | 7.83                    | 0.172          | 7.55           | 0.169          |

---

|          |      |       |      |       |      |       |      |       |
|----------|------|-------|------|-------|------|-------|------|-------|
| Tianjin  | 3.78 | 0.099 | 4.08 | 0.104 | 4.60 | 0.113 | 4.47 | 0.111 |
| Urumqi   | 4.83 | 0.100 | 5.25 | 0.105 | 5.99 | 0.114 | 5.80 | 0.112 |
| Kunming  | 2.99 | 0.080 | 3.21 | 0.084 | 3.59 | 0.091 | 3.49 | 0.089 |
| Hangzhou | 3.72 | 0.108 | 4.00 | 0.113 | 4.51 | 0.123 | 4.38 | 0.120 |

---

**Table S9** Parameters used in the economic analysis.

| Parameter                            | Symbol   | Value  | Reference |
|--------------------------------------|----------|--------|-----------|
| Discount rate (%)                    | $r$      | 8      | Ref [54]  |
| System lifespan                      | N        | 20     | Ref [56]  |
| Price of the PV subsystem (USD/kW)   | $i_{PV}$ | 700.35 | Ref [57]  |
| Operation and maintenance factor (%) | $r_{OM}$ | 0.15   | Ref [58]  |

**Table S10** Laboratory-scale prices of the raw materials for the preparation of full-cement ESDs.

| Chemical         | CAS number and parameters     | Quantity (kg) | Total price (USD) | Unit price (USD kg <sup>-1</sup> ) |
|------------------|-------------------------------|---------------|-------------------|------------------------------------|
| Carbon black     | 1333-86-4                     | 0.02          | 5.81              | 290.6                              |
|                  |                               | 0.1           | 7.27              | 72.7                               |
|                  |                               | 1             | 23.25             | 23.25                              |
|                  |                               | 10            | 29.06             | 2.906                              |
|                  |                               | 15            | 34.87             | 2.325                              |
| MnO <sub>2</sub> | 1313-13-9                     | 0.1           | 4.09              | 40.9                               |
|                  |                               | 1             | 18.64             | 18.64                              |
|                  |                               | 5             | 46.58             | 9.316                              |
| Carbon fiber     | 7440-44-0<br>3 mm, de-resined | 0.5           | 11.62             | 23.24                              |
|                  |                               | 1             | 14.53             | 14.53                              |
|                  |                               | 10            | 72.65             | 7.265                              |
|                  |                               | 0.1           | 2.54              | 25.4                               |
| Ammonium acetate | 631-61-8                      | 0.5           | 3.05              | 6.1                                |
|                  |                               | 1             | 4.37              | 4.37                               |
|                  |                               | 5             | 13.73             | 2.746                              |
|                  |                               | 0.02          | 14.73             | 736.67                             |
| CNT-solution     | Solid content 6%<br>7-11 nm   | 0.1           | 30.03             | 300.3                              |
|                  |                               | 1             | 72.65             | 72.65                              |
|                  |                               | 10            | 116.24            | 11.624                             |
| Acrylic paint    | 1.25 kg L <sup>-1</sup>       | 1             | 18.89             | 18.89                              |
|                  |                               | 25            | 46.50             | 1.86                               |

**Table S11** Estimation of the costs of the raw materials based on their laboratory-scale prices.

| Chemical         | Intercept, a | Slope, b | Unit price for 1000kg (USD/kg) |
|------------------|--------------|----------|--------------------------------|
| Carbon black     | 2.92         | -0.92    | 0.032                          |
| MnO <sub>2</sub> | 2.994        | -0.453   | 0.88                           |
| Carbon fiber     | 2.932        | -0.5     | 0.59                           |
| Ammonium acetate | 1.667        | -0.51    | 0.16                           |
| CNT-solution     | 5.061        | -0.777   | 0.74                           |
| Acrylic paint    | 2.939        | -0.723   | 0.13                           |

Estimation using the log-linear model:  $\ln(P)=a+b\ln(Q)$ .

**Table S12** Bulk commodity market prices of raw materials and battery cells ( $i_{Bat}$ ).

| Classification                                          | Bulk commodity           | Price                             | Statistical institution                            | Source website                                                                                                                           |
|---------------------------------------------------------|--------------------------|-----------------------------------|----------------------------------------------------|------------------------------------------------------------------------------------------------------------------------------------------|
| Raw materials of full-cement ESDs                       | Cement                   | 0.042                             | China Cement Network                               | <a href="https://index.cccement.com/">https://index.cccement.com/</a>                                                                    |
|                                                         |                          | USD<br>kg <sup>-1</sup>           | National Bureau of Statistics of China             | <a href="https://www.stats.gov.cn/">https://www.stats.gov.cn/</a>                                                                        |
|                                                         | Nickel                   | 17.246<br>USD<br>kg <sup>-1</sup> | Trading Economics<br>Shanghai Metals Market        | <a href="https://tradingeconomics.com/">https://tradingeconomics.com/</a><br><a href="https://www.metal.com/">https://www.metal.com/</a> |
| Battery cells commonly used for building energy storage | BMS                      | 16.67<br>USD<br>kWh <sup>-1</sup> | National Renewable Energy Laboratory               | <a href="https://docs.nrel.gov/">https://docs.nrel.gov/</a>                                                                              |
|                                                         | Lithium-Ion Battery Pack | 305<br>USD<br>kWh <sup>-1</sup>   | BloombergNEF 2025 lithium-ion battery price survey | <a href="https://about.bnef.com/">https://about.bnef.com/</a>                                                                            |
|                                                         | Sodium-Sulfur Battery    | 465<br>USD<br>kWh <sup>-1</sup>   | U.S. Energy Information Administration             | <a href="https://www.energy.gov/">https://www.energy.gov/</a>                                                                            |
|                                                         | Flow batteries           | 425<br>USD<br>kWh <sup>-1</sup>   | Industry reports from ZION TECHNOLOGIES            | <a href="https://docs.nrel.gov/">https://docs.nrel.gov/</a>                                                                              |

The prices of cement and nickel are the average value of the two institutions.

The prices of battery cells have considered the battery rack, which holds stacked cells, modules, or packs, including the BMS, wiring, and the rack housing.

**Table S13** Cost breakdown of full-cement ESDs, considering materials, manufacturing, and integration.

| Classification | Composition                       | Required Weight<br>(kg) | Unit price for 1000kg<br>(USD/kg) | Cost (USD<br>$m^{-2}$ ) |
|----------------|-----------------------------------|-------------------------|-----------------------------------|-------------------------|
| Materials      | Cement                            | 12.6                    | 0.042                             | 0.532                   |
|                | Carbon black                      | 0.729                   | 0.032                             | 0.0233                  |
|                | MnO <sub>2</sub>                  | 0.4375                  | 0.88                              | 0.385                   |
|                | Carbon fiber                      | 0.05                    | 0.59                              | 0.0295                  |
|                | CNT-solution                      | 1.25                    | 0.74                              | 0.925                   |
| Manufacturing  | Cement of conventional wallboards | 25                      | 0.042                             | -1.05                   |
|                | Electrolyte (ammonium acetate)    | 0.241                   | 0.16                              | 0.0387                  |
|                | Coating layer (Acrylic paint)     | 0.208                   | 0.13                              | 0.027                   |
| Integration    | Current collector (nickel)        | 0.0445                  | 17.246                            | 0.767                   |
|                | BMS                               | \                       | \                                 | 0.147                   |

The required weight is the weight of the preparation to produce 1  $m^2$  of the full-cement ESDs as energy storage wallboards.

The cost of full-cement ESDs is defined here as the incremental cost, calculated as the price of the energy-storing wallboard minus that of a conventional wallboard.

The cost of full-cement ESDs is 1.825 USD  $m^{-2}$ .
